# Supplementary material
Source: HighWire-hosted journal article supplement (https://www.annfammed.org/highwire/filestream/8397/field_highwire_adjunct_files/0/535Suppl_Table.pdf)
Supplement: 535Suppl_Table.pdf [file 535Suppl_Table.pdf]

Online Supplementary Material

Brett T, Arnold-Reed DE, Popescu A, et al. Multimorbidity in patients attending 2 Australian primary care practices. *Ann Fam Med*. 2013;11(6):535-542.

<http://www.annfammed.org/content/11/6/535>

| <b>Supplemental Table. List of Conditions Categorized According to Body System Domains</b> |                                                                                                                                                             |
|--------------------------------------------------------------------------------------------|-------------------------------------------------------------------------------------------------------------------------------------------------------------|
| <b>Domain</b>                                                                              | <b>Morbidities</b>                                                                                                                                          |
| Musculoskeletal, integumental                                                              | Osteoarthritis<br>Osteoporosis<br>Rheumatoid arthritis<br>Chronic back pain/skin disorders                                                                  |
| Psychiatric                                                                                | Anxiety<br>Depression<br>Psychosis<br>Drug abuse<br>Alcohol abuse<br>Other psychiatric                                                                      |
| Respiratory                                                                                | Asthma<br>Chronic obstructive pulmonary disease<br>Smoking                                                                                                  |
| Vascular                                                                                   | Peripheral vascular disease<br>Hyperlipidemia<br>Abdominal aortic aneurysm<br>Coronary artery bypass graft surgery<br>Other vascular including hypertension |
| Endocrine                                                                                  | Diabetes<br>Metabolic disorder<br>Breast<br>Obesity<br>Menopause<br>Other endocrine                                                                         |
| Eye, ear, nose and throat                                                                  | Eye problems<br>Ear, nose, and throat problems<br>Dizziness                                                                                                 |
| Genitourinary, prostate                                                                    | Genitourinary/prostate                                                                                                                                      |
| Lower gastrointestinal                                                                     | Abdominal surgery<br>Other gastrointestinal problems                                                                                                        |
| Hematological                                                                              | Anemia<br>Other hematological                                                                                                                               |
| Upper gastrointestinal                                                                     | Stomach<br>Oesophagus<br>Gastroesophageal reflux disease                                                                                                    |
| Neurological                                                                               | Cerebrovascular accident<br>Other neurological                                                                                                              |
| Cardiac                                                                                    | Ischemic heart disease<br>Chronic heart failure<br>Other cardiac                                                                                            |
| Hepatic, pancreatic                                                                        | Hepatic, pancreatic                                                                                                                                         |
| Renal                                                                                      | Renal                                                                                                                                                       |
